# Supplementary material
Source: MDPI journal article supplement (https://www.mdpi.com/2072-4292/9/10/982)
Supplement: s1 [file s1]

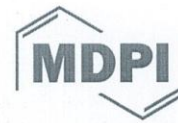

## 作者声明

请在相应标题下填写相关信息，必须有所有作者的签名。请注意，我们只接受手写签名。请在投稿时一起上传所有作者签名的作者声明，否则我们无法继续处理您的投稿。

稿件题目: Wuhan Surface Subsidence Analysis in 2015-2016 Based on Sentinel-1A Data by SBAS-InSAR

通讯作者: Jiming Guo

文章类型: Article

### 作者贡献

我们遵循科学编辑理事会 (Council of Science Editors, CSE) 建议的作者署名标准，需要同时符合以下 3 条标准：

1. 对研究的思路或者设计有重要贡献，或者为研究获取、分析或解释数据；
2. 对将要发表版本做最终定稿；
3. 同意对研究工作的各个方面承担责任，以确保与稿件任何部分的准确性或诚信有关的质疑得到恰当的调查和解决。

所有被列为作者的人应该符合以上 3 条标准，所有符合以上 3 条标准的人才能作为作者在稿件中署名。那些不满足以上 3 条标准，但是对稿件涉及的研究工作有贡献的人只能放在致谢中。请在下面填写每位作者对稿件的贡献，例如文献检索，制作图表，研究设计，数据收集，数据分析，稿件撰写等。如果有多位作者贡献相当，请一并说明。这里提供的信息必须与稿件中作者贡献部分的声明一致。

All authors contributed to the manuscript and discussed the results. Jiming Guo and Lv Zhou developed the idea that led to this paper. Lv Zhou performed Sentinel-1A data processing and analyses, and contributed to the manuscript of the paper. Jiming Guo provided critical comments and contributed to the final revision of the paper. Jiangwei Li performed the leveling data processing and analyzed the leveling-derived results. Yongfeng Xu performed the water level changes data processing and provided critical comments. Jiyuan Hu and Yuanjin Pan interpreted the SBAS InSAR-derived results and revised the manuscript. During the revision of manuscript, Miao Shi helped to calculate the GRG between subsidence and water level time series and analyze the relationship between surface subsidence and water level changes, and revised the manuscript. In addition, All authors contributed to the final revision of manuscript. And all authors agreed to take responsibility for the research work.

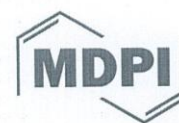

## 利益冲突

请在下面表格中填写：1.作者可能的利益冲突；2. 支持研究工作的来源，包括资助机构名称，以及资助机构是否参与并影响研究设计的数据收集，分析和解释，以及稿件撰写；3.作者是否一致同意将稿件提交给该期刊；4. 资助机构是否影响稿件的提交等等

1. The authors declare no conflict of interest.
2. This work was supported by the National Nature Science Foundation of China (Grant Nos. 41474004, 41461089 and 41604019); the Key Laboratory for Digital Land and Resources of Jiangxi Province, East China University of Technology (No. DLLJ201711); and the Open Fund of Guangxi Key Laboratory of Spatial Information and Geomatics (Grant No. 15-140-07-32). The Wuhan Geomatics Institute for providing leveling data and the Changjiang Wuhan Waterway Bureau for providing the daily water level changes of Yangtze River, The School of Geodesy and Geomatics, Wuhan University contributed to data processing and analyses, and the manuscript.
3. All authors agreed to submit the manuscript to the journal *Remote Sensing*.
4. Funding agencies do not affect the submission of manuscript.

我同意：1. 将稿件投给 *Remote Sensing*; 2. 稿件中所有内容；3. 被列为作者；4. 以上的利益冲突声明。我检查过稿件中所有数据，图，表，并对其真实性和准确性承担责任

|                                                   |                    |         |                |
|---------------------------------------------------|--------------------|---------|----------------|
| 职务和姓名: PhD Candidate,<br>Lv Zhou (周吕)             | 最高学历: M.Sc. degree | 签名: 周吕  | 日期: 2017.9.8   |
| 职务和姓名: Professor,<br>Jiming Guo (郭际明)             | 最高学历: Ph.D. degree | 签名: 郭际明 | 日期: 2017.09.08 |
| 职务和姓名: PhD Candidate,<br>Jiyuan Hu (胡纪元)          | 最高学历: M.Sc. degree | 签名: 胡纪元 | 日期: 2017.09.08 |
| 职务和姓名: Senior Engineer,<br>Jiangwei Li (李江卫)      | 最高学历: Ph.D. degree | 签名: 李江卫 | 日期: 2017.09.08 |
| 职务和姓名: Engineer,<br>Yongfeng Xu (徐永峰)             | 最高学历: M.Sc. degree | 签名: 徐永峰 | 日期: 2017.09.08 |
| 职务和姓名: Assistant Researcher,<br>Yuanjin Pan (潘元进) | 最高学历: Ph.D. degree | 签名: 潘元进 | 日期: 2017.09.08 |
| 职务和姓名: Assistant Engineer,<br>Miao Shi (石淼)       | 最高学历: M.Sc. degree | 签名: 石淼  | 日期: 2017.09.08 |

## 通讯作者声明

我 郭际明 (中文名) 作为稿件的通讯作者，确认稿件中作者贡献和利益冲突声明正确无误，并在投稿前已取得所有作者的同意
